# Supplementary material
Source: PubMed Central journal article supplement (PMC3167559)
Supplement: 1100189108_sapp.pdf [file 1100189108_sapp.pdf]

## Supporting Information to

### **“Reconstruction of a 1,910–y–long locust series reveals consistent associations with climate fluctuations in China” by Huidong Tian, Leif C. Stige, Bernard Cazelles, Kyrre Linne Kausrud, Rune Svarverud, Nils C. Stenseth and Zhibin Zhang**

|                                                   |                |
|---------------------------------------------------|----------------|
| Part A. Reconstruction of locust abundance series | pages: 01 – 09 |
| Part B. Additional modeling material              | pages: 10 – 13 |
| References                                        | page : 14      |
| Dataset S1                                        | pages: 15 – 22 |
| Dataset S2                                        | pages: 23 – 34 |

#### **Part A. Reconstruction of locust abundance series**

##### **1. Locust records in historical documents.**

There are 8343 locust records in *A Compendium of Chinese Meteorological Records of the Last 3000 Years* (1), most of which derive from two types of historical documents: standard histories and local gazetteers. Standard histories, such as *Twenty-four Histories*, *Comprehensive Mirror to Aid in Government* and *Draft History of Qing Dynasty*, were stringently organized and compiled by the succeeding dynasty and are generally considered authoritative and credible sources of Chinese history (2). Local gazetteers (including provincial, prefectural and district gazetteers) were compiled and produced by local officials, which embrace various types of information concerning historical, geographical, economic, administrative, natural and other aspects of a locality in China. The earliest locust records appeared in *The Spring and Autumn Annals* in BC 707. However, systematic and continuous recording of locust outbreaks only starts from the year AD 2 in the *History of the Former Han Dynasty*. From then on, locust records frequently appeared in standard histories. In AD 1418, the Yongle Emperor (AD 1360–1424) ordered all counties of China to compile gazetteers, and decreed *The Guideline of Gazetteers Compilation* (3). By the end of

the Ming dynasty (AD 1368–1644), almost every county or prefecture had its own gazetteer (4) and numerous locust records were preserved.

We separated the locust records into two periods characterized by different recording frequencies as well as different types of source documents: period A (AD 2–1367) and period B (AD 1368–1911). In period A, 598 out of 639 locust records derive from standard histories, while in period B, 7519 out of 7677 locust records derive from local gazetteers. Eastern China, mainly covering the Yellow River basin and the Yangtze River basin, is the most important agricultural region in China. Almost all of the locust records are from this region, although some records appeared from areas further south in period B (Fig. S1A, B). In order to ensure consistent spatial coverage throughout the period studied we restricted our study area to the area around the middle and lower parts of the Yellow River and Yangtze River basins (yellow polygon in Fig. S1A, B). This area also coincides with the core distribution area for Oriental migratory locusts (*Locusta migratoria manilensis*) in China (5).

The descriptions of locust outbreaks in period A are quite diverse in the level of detail, and some of them are ambiguous especially in its earlier period. For example: "*summer, locust*"; "*12 provinces had locust*"; "*6 states had locust*"; "*Province Si, Ji, Qing and Yong had locust*". Period B contains more detailed descriptions of locust outbreaks. For example: "*Locusts ate up all crops*"; "*Flying locusts darkened the sky and seriously injured crops*"; "*Locust outbreak from spring to autumn*". Further, the spatial extent of the outbreaks in period B can generally be inferred from the information in the various local gazetteers.

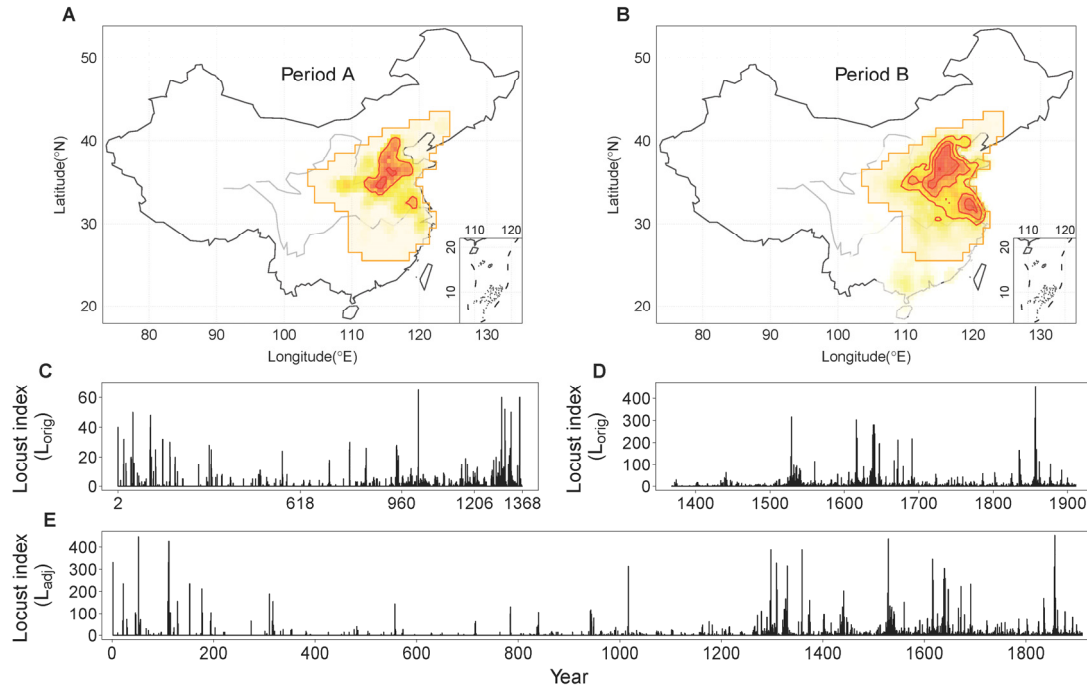

Fig. S1. Spatial extent of locust records in China in period A (AD 2–1367; panel A) and period B (AD 1368–1911; panel B). The yellow polygon shows the area considered in this study. The mean frequency of locust records is indicated by background colors ranging from light–yellow (low frequency) to dark–red (high frequency). (C) Initial reconstructed locust abundance index for period A ( $L_{orig}$ ; scale: number of prefectures with locust reports). The index is comparable within but not among four sub–periods due to variation in administrative boundaries: Han–Sui, AD 2–618; Tang, AD 618–960; Song, AD 960–1206 and Yuan, AD 1206–1368. (D) Initial reconstructed locust abundance index for period B ( $L_{orig}$ ; scale: number of counties with locusts multiplied with outbreak intensity, ranked 1–3). (E) Final reconstructed locust abundance index for AD 2–1911 ( $L_{adj}$ ) before log–transformation.

## 2. Reconstruction method

The number of prefectures with reports of locusts per year was chosen as the initial locust index ( $L_{orig}$ ) for period A because most of locust records referred to the number or list of prefectures having locust outbreaks. For ambiguous records, the numbers of prefectures were assigned by author’s comprehension of the historical context.

Since the administrative divisions of China were not fixed but changed from dynasty to dynasty, prefecture numbers in different periods can not be compared directly. For example, the numbers of prefectures in Later Han (AD 25–220), Three

Kingdoms (AD 220–280), Jin (AD 265–420), South and North Dynasties (AD 240–589) and Sui (AD 581–618) are 105, 158, 172, 628 and 190, respectively (6). To partly address this problem, period A was divided into four sub-periods with relatively stable administrative divisions (Fig. S1C), and prefecture numbers were standardized within each sub-period. For example, the first sub-period (AD 2–618) includes a unified and stable period Han (AD 2–220) and several divided and chaotic periods (Three Kingdoms – Sui dynasty, AD 220–618). Locust index values for this sub-period were standardized to Later Han prefecture number units by comparing outbreak locations on maps from around the time of the outbreak with a map of the administrative division of the Later Han dynasty. Note that the initial locust index values are thus comparable within but not among sub-periods.

The majority of locust records in period B come from district gazetteers (about 5700) and the rest are mainly from prefecture gazetteers (about 1400). There were 179 and 276 prefectures in Ming and Qing dynasties, respectively, and this difference could potentially bias a locust index based on numbers of prefectures with locust outbreaks (period A). However, the total number of counties changed proportionately less (being 1427 and 1579, in Ming and Qing dynasties, respectively) (6). Moreover, prefectural gazetteers were generally compiled by summarizing the information in district gazetteers under their jurisdiction, and areas of counties were relatively stable in imperial era of China (6). Thus, county was used as spatial unit for period B. Locust records in period B contain detailed descriptions about the intensity of locust outbreaks. An intensity grade ranked 1–3 was assigned to each record according to its context. Grade 1 was used for commonly occurring records, such as: “*Locusts*”; “*Nymphs*”; “*Locusts ate crops*”. Grade 2 was used for records of serious outbreaks, such as: “*Serious locust outbreak*”; “*Flying locusts darkened the sky and seriously injured crops*”; “*Locusts ate up all crops*”. Grade 3 was used for records of extreme upsurge, such as: “*Locust outbreak all the year*”; “*Locusts covered the land nearly one foot deep*”; “*Serious locust outbreak from summer to autumn, locusts ate up crops, grass and small branches, darkened the sun and filled up all lower places wherever they arrived, thus causing men and horses trouble to walk*”. The original locust index ( $L_{orig}$ ) for period B (Fig. S1D) was calculated by summing the intensity grade values across all counties with recorded locusts in a year (the highest grade was used if there were several locust records for a county in one year). The locust index for period B

thus integrates information about spatial extent and intensity of locust outbreaks.

The reconstructed locust series for period B displayed a significant increasing trend ( $P < 0.05$ ), and its first one third seems to be abnormally lower than the rest (Fig. S1D). One likely reason for this trend is bias from increased recording effort (number of available gazetteers). The total number of meteorology-related records (including records of locusts, flood, drought, rainfall etc.) of each year in the source compendium for the locust data (1), which can be taken as a proxy of recording effort, also showed increasing trend ( $P < 0.001$ ) and was abnormally low during the first one third of period B (Fig. S2A). The locust abundance series was first attempted corrected for recording effort by using the formula:

$$L_{rect} = (G_{max}/G) \cdot L_{orig} \quad (1),$$

where  $L_{rect}$  is the rectified locust index,  $L_{orig}$  is the original (uncorrected) locust index for period B,  $G$  is smoothed meteorological record number (Fig. S2A) and  $G_{max}$  is the maximum of  $G$  (smoothing: natural cubic spline function of year in a generalized additive model, as implemented using the *gam* function in the *mgcv* package (7) of the program R (8)). However,  $L_{rect}$  decreased significantly ( $P < 0.05$ ), indicating that this method over-compensated for lower sampling effort in the earliest period. Thus we used the formula:

$$L_{adj} = (L_{rect} + L_{orig})/2 \quad (2),$$

to balance the rectified and the original locust abundance. In contrast to  $L_{orig}$  and  $L_{rect}$ ,  $L_{adj}$  (Fig. S2B) showed no significant linear trend ( $P > 0.1$ ).

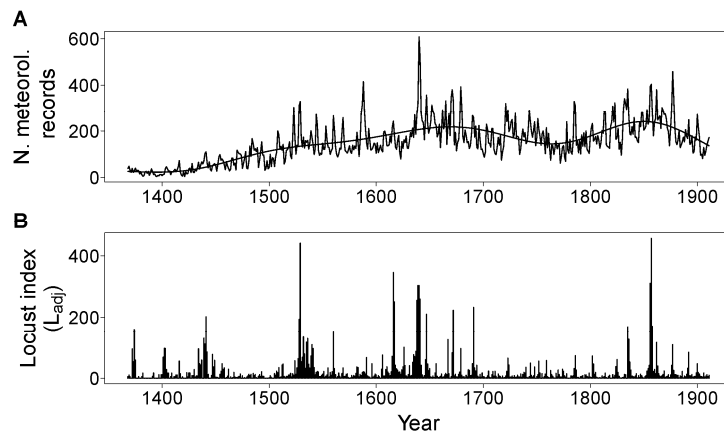

Fig. S2. (A) Number of all meteorology–related records in period B and smoothed line ( $G$ , eq. 1) used as indicator of recording effort. (B) Locust abundance index for period B adjusted for recording effort ( $L_{adj}$ ).

As mentioned above, the initial locust index values for different sub–periods in period A are not comparable with each other or with locust index values for period B. These values were therefore transformed to the same unit used for period B. To do so, a regression equation was developed for each of the four sub–periods, to convert from numbers of locust–infested prefectures (the initial locust unit for period A) to the  $L_{adj}$  index scale of period B. The regression equations were developed by transposing maps of period A prefecture boundaries on the county–resolved maps of locust reports in AD 1512–1911 (relative stable recording effort, see Fig. S2A), counting how many period A prefectures were infested by locusts for each of these years (i.e., given the older administrative divisions), and finally regressing these calculated prefecture numbers on the  $L_{adj}$  index values for the same years. For example, given that the locations of locust outbreaks in a year in period B with  $L_{adj} = 150$  fell inside of 30 prefectures in Later Han’s map (the first sub–period of period A), then the locust index value 30 in this sub–period of period A corresponds to a locust index value of 150 in period B. The maps for the four sub–periods of period A were selected from the Later Han, Tang, Song and Yuan dynasties, respectively (9). The regression equations were developed using generalized additive models of  $L_{adj}$  as natural cubic spline functions of calculated prefecture number, shown in Fig. S3A–D. By combining the transformed locust index values for period A with those from period B, a 1910–years long (AD 2–1911) annual locust series was constructed (Fig. S1E, Dataset S1, Dataset S2). The reconstructed annual locust series was highly skewed, and for the convenience of statistical analysis, the final annual locust index was log–transformed:  $L_{ann} = \ln(L_{adj} + 1)$ .

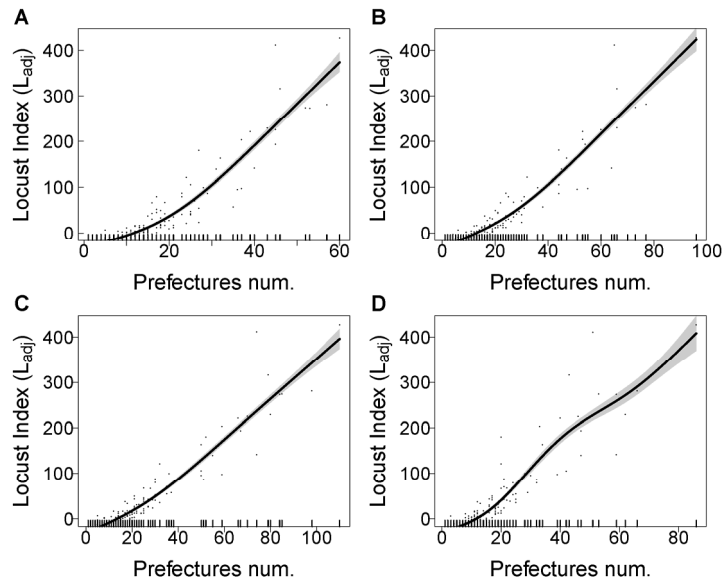

Fig. S3 Regression lines used to transform locust index values ( $L_{orig}$ ) for the four sub-periods in period A to the scale used in period B ( $L_{adj}$ ). (A) Han–Sui, AD 2–618; (B) Tang, AD 618–960; (C) Song, AD 960–1206 and (D) Yuan, AD 1206–1368 (see Fig. S1C). Response: locust index values for years 1512–1911. Predictors: calculated numbers of locust-infested prefectures using maps for each of the four sub-periods. Deviances explained by the four regression models are: 0.936, 0.957, 0.963, and 0.911, respectively.

### 3. Comparison of our locust series with Ma’s 1000–years–long locust series

The number of locust records used to construct the new locust index is twice of that used by Ma (5), thus the new locust index should be more reliable. We here extracted Ma’s locust series for AD 960–1959 from Fig. 9A in (5) by consulting the literature sources (10, 11) used by Ma to obtain accurate temporal resolution. We can see that the two locust indices matched very well and that they have similar trends (Fig. S4A, B). The frequency distributions of the two locust series have similar patterns, although our series contain a higher proportion of intermediate values. The correlation between the two locust series is 0.79, which shows that reconstructed locust abundance is not very sensitive to reconstruction method. Periodicity analysis shows that the two locust series have similar wavelet decomposition and global spectrum pattern: two predominant frequencies appeared around periods of 110 years and 30 years, but our new locust series shows somewhat smoother frequency spectrum (Fig. S4C, D).

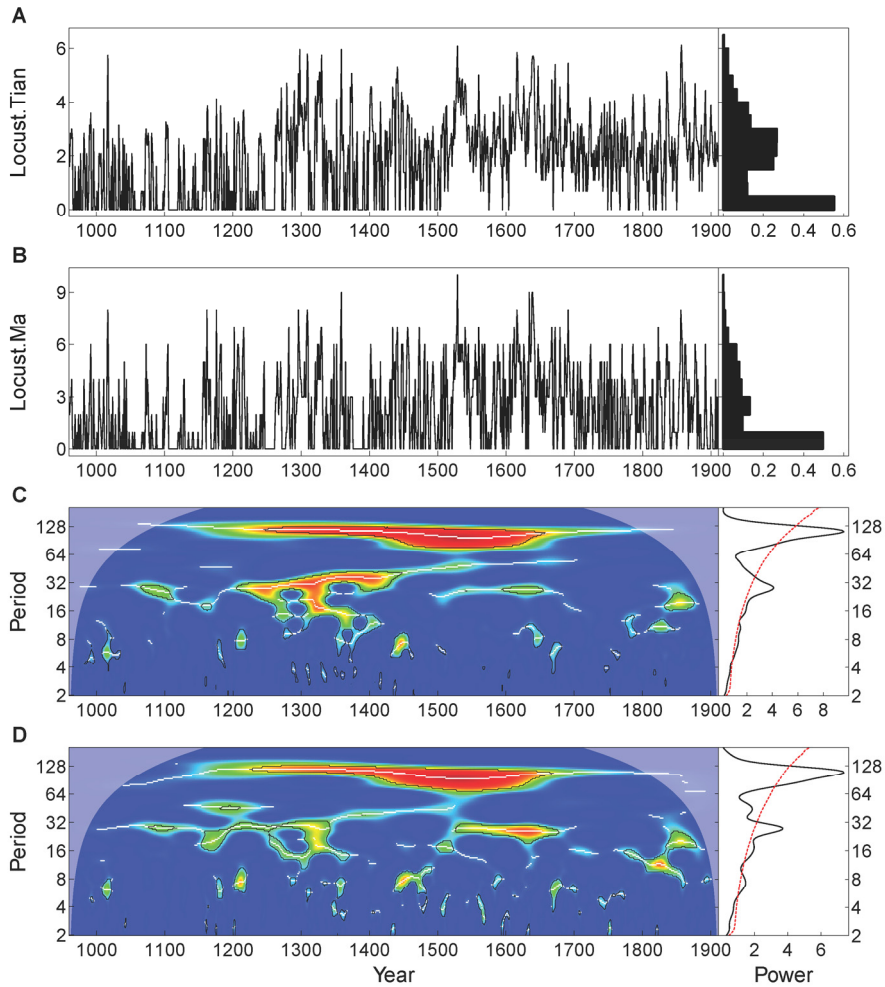

Fig.S4 Comparison between our newly constructed locust series and Ma's locust series (5). The two locust series and their frequency distributions (A: newly constructed,  $L_{ann}$ ; B: Ma's locust series). Wavelet decomposition and global power spectra of the two series (C: newly constructed; D: Ma's locust series). See legend of Fig. 2 for wavelet decomposition.

#### 4. Decadal locust series

A decadal locust series was constructed as described in the main text. The assumption behind the construction of this index is that years without locust reports are a random subset of the years. Alternatively, one could hypothesize that years with locust reports were years with heavy locust outbreaks. Period A has a higher proportion of years having no locust report than period B (73% compared to 12%). If data were missing at random, one would expect similar frequency distributions of non-missing locust index values for periods A and B, whereas if missing values generally



represented low locust abundance one would expect a distribution skewed towards high values in period A. The frequency distributions for the two periods appear similar (except for a higher proportion of very low values in period A; Fig. S5), providing support for the assumption of randomness. Mean and standard deviation of the normalized decadal locust index ( $L_{dec}$ ) did not differ significantly between periods A and B ( $P > 0.10$ ; A: Mean =  $-0.13$ , SD = 1.37; B: Mean =  $-0.09$ , SD = 1.55), providing additional support for the assumption of randomness being approximately correct.

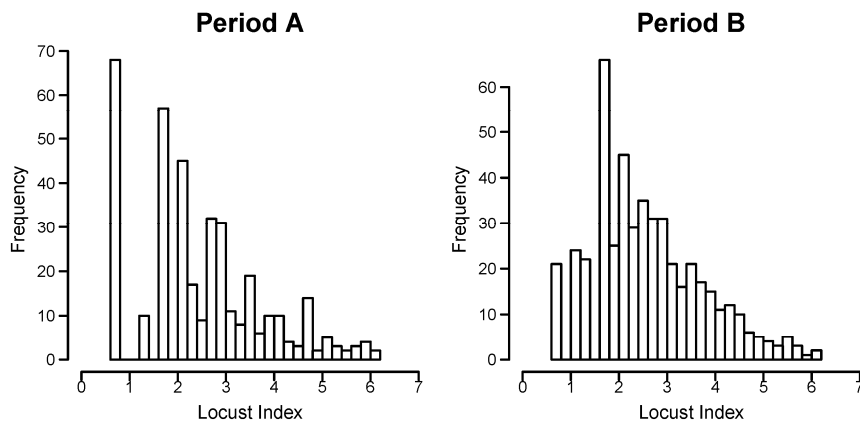

Fig. S5 Distribution histograms of annual locust index in periods A and B.

## Part B. Additional modeling material

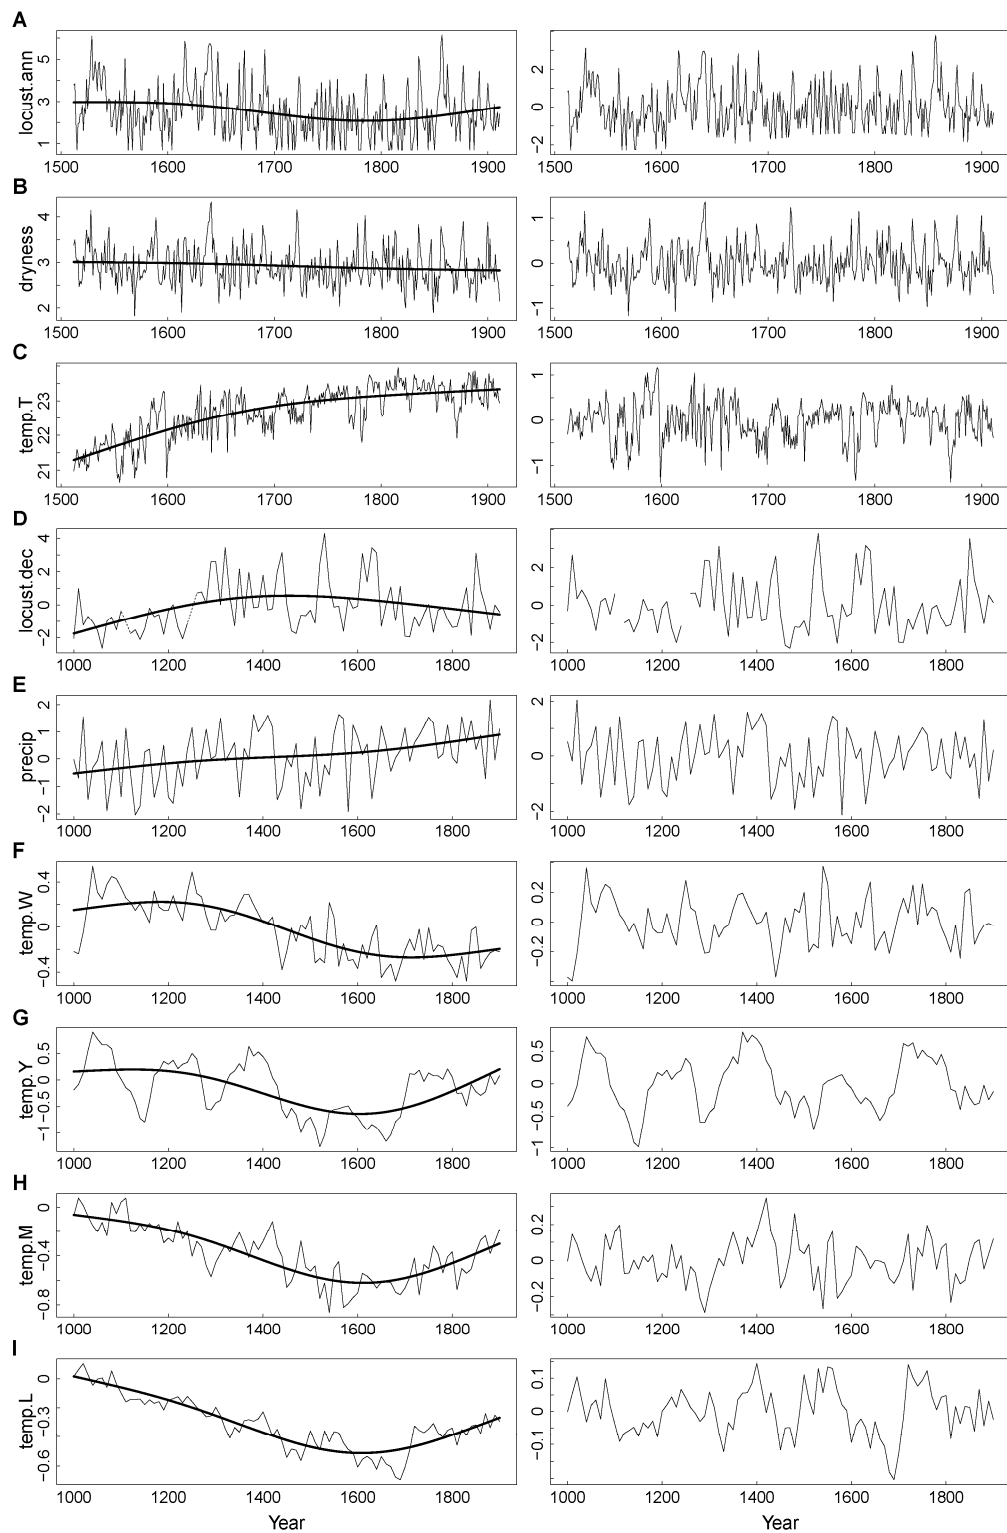

Fig. S6 Original data series with low-frequency trend imposed (left column) and their detrended version (right column). Trends were estimated using generalized additive models of the climate variable as a smooth function of year (natural cubic spline with the number of knots fixed at 4).

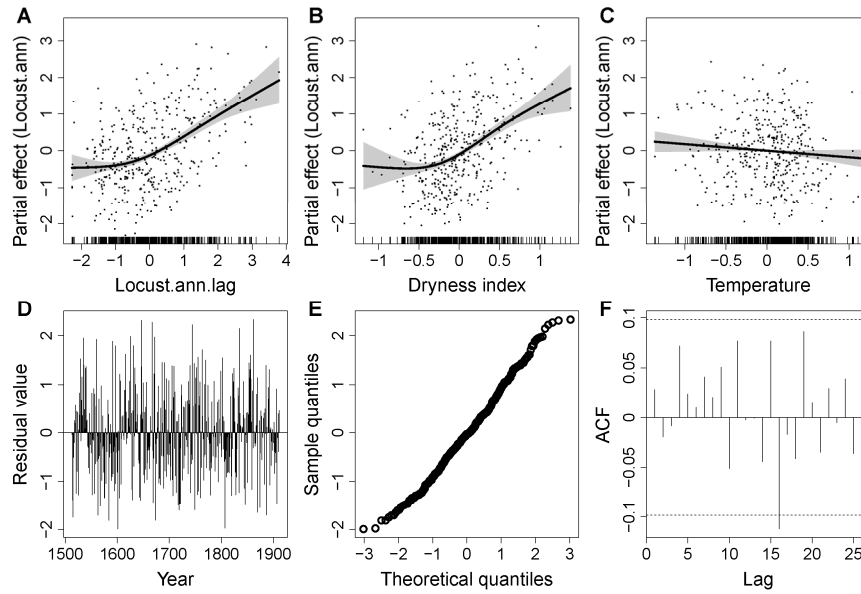

Fig. S7. Regression analysis of effects of climate on annual-scale locust dynamics using detrended data (shown in the right column of Fig. S6). Panels A, B and C show the effects of previous-year's locust abundance, dryness and temperature, respectively, on locust abundance. Residual diagnostics reveal no residual trend (D), approximate normal distribution of residuals (E, the quantile plot of residuals forms a nearly straight line), and a significant negative autocorrelation function (ACF) of residuals at lag 16 (F), which is, however, unlikely to invalidate statistical inferences. The model explained 43.2 % of the variance in the detrended locust series. Estimated effects of predictor variables are qualitatively similar to results obtained using the original (not detrended) data (Fig. 3).

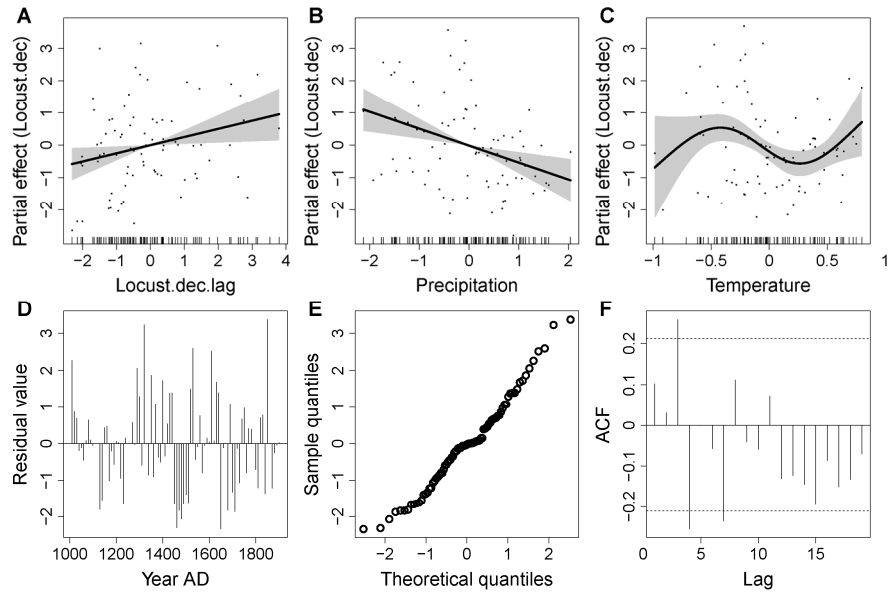

Fig. S8 Regression analysis of effects of climate on decadal-scale locust dynamics using detrended data (shown in Fig. S6). Panels A, B and C show the effects of previous-decade's locust abundance, precipitation and temperature, respectively, on current decade's locust abundance. Time-series of residuals reveals no residual trend (D). Residuals were approximately normal distributed (E). Autocorrelation function of residuals (ACF) reveals significant positive auto-correlation at lag 3 decades and negative autocorrelation at lag 4 and 7 decades (F), which are not thought to have large influence on statistical inferences. The model explained 26.3 % of the variance in the detrended locust series. Estimated effects of previous-decade locust abundance and precipitation are qualitatively similar to results obtained using the original (not detrended) data (Fig. 4), whereas the estimated temperature effect is nonlinear instead of linearly negative.

Table S1. Summary of alternative regression models of locust dynamics. Model: generalized additive model, as described in main text or with one or both climate terms removed.  $L_{ann}$ : annual locust index.  $L_{dec}$ : decadal locust index.  $P$ : precipitation index (annual analysis: “dryness”; decadal analysis: “precip”).  $T$ : temperature index (annual analysis: “temp.T”; decadal analysis: “temp.Y”). Effect: general sign of effect and approximate statistical significance (+: positive, -: negative, ~: wave-shaped; \*: P<0.05, \*\*: P<0.01, \*\*\*: P<0.001; the assumptions of independence of residuals not checked in all models). Dev.expl: proportion of deviance explained by the models.

| Data series       | Model                                               | Effect    |      |      | Dev.expl |
|-------------------|-----------------------------------------------------|-----------|------|------|----------|
|                   |                                                     | $L_{T-1}$ | $P$  | $T$  |          |
| Original annual   | $L_{ann, T} \sim f(L_{ann, T-1})$                   | ****      | **** |      | 0.308    |
|                   | $L_{ann, T} \sim f(L_{ann, T-1}) + g(P_T)$          | ****      |      |      | 0.459    |
|                   | $L_{ann, T} \sim f(L_{ann, T-1}) + h(T_T)$          | ****      |      | **** | 0.327    |
|                   | $L_{ann, T} \sim f(L_{ann, T-1}) + g(P_T) + h(T_T)$ | ****      | **** | **   | 0.470    |
| Original decadal  | $L_{dec, T} \sim f(L_{dec, T-1})$                   | **        |      |      | 0.108    |
|                   | $L_{dec, T} \sim f(L_{dec, T-1}) + g(P_T)$          | ****      | **   |      | 0.213    |
|                   | $L_{dec, T} \sim f(L_{dec, T-1}) + h(T_T)$          | +         |      | *    | 0.171    |
|                   | $L_{dec, T} \sim f(L_{dec, T-1}) + g(P_T) + h(T_T)$ | **        | *    | *    | 0.256    |
| Detrended annual  | $L_{ann, T} \sim f(L_{ann, T-1})$                   | ****      | **** |      | 0.264    |
|                   | $L_{ann, T} \sim f(L_{ann, T-1}) + g(P_T)$          | ****      |      |      | 0.427    |
|                   | $L_{ann, T} \sim f(L_{ann, T-1}) + h(T_T)$          | ****      |      | *    | 0.270    |
|                   | $L_{ann, T} \sim f(L_{ann, T-1}) + g(P_T) + h(T_T)$ | ****      | **** | *    | 0.432    |
| Detrended decadal | $L_{dec, T} \sim f(L_{dec, T-1})$                   | +         |      |      | 0.046    |
|                   | $L_{dec, T} \sim f(L_{dec, T-1}) + g(P_T)$          | **        | **** |      | 0.177    |
|                   | $L_{dec, T} \sim f(L_{dec, T-1}) + h(T_T)$          | +         |      | ~*   | 0.161    |
|                   | $L_{dec, T} \sim f(L_{dec, T-1}) + g(P_T) + h(T_T)$ | +         | **   | ~*   | 0.263    |

## References:

1. Zhang D (2004) *A Compendium of Chinese Meteorological Records of the Last 3000 Years* (Jiangsu Education Publishing House, Nanjing). (Chinese).
2. Wilkinson E (2000) *Chinese history: a manual* (Harvard University Asia Center, Cambridge, Mass).
3. Zhang Y (2004) Discussion on the compilation of 'Daming yitongzhi'. *Journal of Historography* 4:48–56. (Chinese)
4. Zurndorfer HT (1995) *China Bibliography: A Research Guide to Reference Works About China Past and Present* (Brill Academic Publishers, Leiden) .
5. Ma S (1958) The population dynamics of the oriental migratory locust (*Locusta migratoria manilensis*) in China. (Translated from Chinese) *Acta Entomol Sin* 8:1–40. (Chinese).
6. Zhou Z (1991) *Successive changes of administrative divisions of China* (Central Party School Press, Beijing). (Chinese)
7. Wood S (2006) *Generalized additive models: an introduction with R* (Chapman and Hall/CRC, Boca Raton, Florida).
8. R Development Core Team (2009) *R: A language and environment for statistical computing* (R Foundation for Statistical Computing, Vienna, Austria).
9. Tan Q (1982) *The Historical Atlas of China*. (China Cartographic Publishing House, Beijing). (Chinese)
10. Chen G (1939) *China Successive Natural and Manmade Disasters Table* (Jinan university book series, Guangzhou) (Chinese).
11. Chen J (1936) Outbreaks of locust recorded in Chinese literatures. *Annual of Zhejiang entomology bureau* 5:188–241.

Dataset S1. Reconstructed annual locust time series for period A (AD 2–1367). Sub-period: Han–Sui, AD 2–618; Tang, AD 618–960; Song, AD 960–1206 and Yuan, AD 1206–1368.  $L_{orig}$ : initial locust index (unit: number of prefectures with locusts).  $L_{orig}$  is comparable within, but not between the four sub-periods.  $L_{adj}$ : final locust index, scaled to the same unit used for period B. The annual locust index used in the analysis and for the construction of a decadal index was log-transformed,  $L_{ann} = \ln(L_{adj} + 1)$ .

| <i>Sub-period</i> | <i>Year (AD)</i> | $L_{orig}$ | $L_{adj}$ |
|-------------------|------------------|------------|-----------|
| Han–Sui           | 2                | 40         | 331       |
| Han–Sui           | 11               | 4          | 11        |
| Han–Sui           | 21               | 15         | 64        |
| Han–Sui           | 22               | 32         | 235       |
| Han–Sui           | 29               | 16         | 71        |
| Han–Sui           | 30               | 10         | 34        |
| Han–Sui           | 46               | 20         | 104       |
| Han–Sui           | 47               | 19         | 95        |
| Han–Sui           | 48               | 2          | 4         |
| Han–Sui           | 49               | 2          | 4         |
| Han–Sui           | 52               | 50         | 450       |
| Han–Sui           | 53               | 6          | 18        |
| Han–Sui           | 54               | 12         | 45        |
| Han–Sui           | 55               | 14         | 57        |
| Han–Sui           | 56               | 16         | 71        |
| Han–Sui           | 67               | 9          | 30        |
| Han–Sui           | 72               | 7          | 22        |
| Han–Sui           | 75               | 2          | 4         |
| Han–Sui           | 82               | 3          | 8         |
| Han–Sui           | 87               | 1          | 1         |
| Han–Sui           | 91               | 1          | 1         |
| Han–Sui           | 92               | 3          | 8         |
| Han–Sui           | 96               | 3          | 8         |
| Han–Sui           | 97               | 5          | 14        |
| Han–Sui           | 110              | 25         | 155       |
| Han–Sui           | 111              | 40         | 331       |
| Han–Sui           | 112              | 48         | 426       |
| Han–Sui           | 113              | 20         | 104       |
| Han–Sui           | 114              | 6          | 18        |
| Han–Sui           | 115              | 20         | 104       |
| Han–Sui           | 121              | 5          | 14        |
| Han–Sui           | 122              | 10         | 34        |
| Han–Sui           | 129              | 25         | 155       |
| Han–Sui           | 130              | 13         | 51        |
| Han–Sui           | 136              | 1          | 1         |
| Han–Sui           | 137              | 1          | 1         |
| Han–Sui           | 142              | 1          | 1         |
| Han–Sui           | 153              | 32         | 235       |
| Han–Sui           | 154              | 1          | 1         |

|         |     |    |     |
|---------|-----|----|-----|
| Han-Sui | 157 | 1  | 1   |
| Han-Sui | 158 | 1  | 1   |
| Han-Sui | 166 | 3  | 8   |
| Han-Sui | 175 | 3  | 8   |
| Han-Sui | 177 | 30 | 212 |
| Han-Sui | 178 | 20 | 104 |
| Han-Sui | 194 | 15 | 64  |
| Han-Sui | 195 | 20 | 104 |
| Han-Sui | 197 | 2  | 4   |
| Han-Sui | 203 | 10 | 34  |
| Han-Sui | 220 | 5  | 14  |
| Han-Sui | 222 | 5  | 14  |
| Han-Sui | 274 | 15 | 64  |
| Han-Sui | 281 | 1  | 1   |
| Han-Sui | 301 | 6  | 18  |
| Han-Sui | 304 | 2  | 4   |
| Han-Sui | 305 | 3  | 8   |
| Han-Sui | 310 | 28 | 189 |
| Han-Sui | 316 | 15 | 64  |
| Han-Sui | 317 | 25 | 155 |
| Han-Sui | 318 | 12 | 45  |
| Han-Sui | 319 | 5  | 14  |
| Han-Sui | 320 | 6  | 18  |
| Han-Sui | 332 | 6  | 18  |
| Han-Sui | 337 | 8  | 26  |
| Han-Sui | 352 | 7  | 22  |
| Han-Sui | 354 | 8  | 26  |
| Han-Sui | 374 | 1  | 1   |
| Han-Sui | 381 | 2  | 4   |
| Han-Sui | 382 | 6  | 18  |
| Han-Sui | 383 | 4  | 11  |
| Han-Sui | 390 | 2  | 4   |
| Han-Sui | 391 | 2  | 4   |
| Han-Sui | 426 | 5  | 14  |
| Han-Sui | 452 | 2  | 4   |
| Han-Sui | 457 | 5  | 14  |
| Han-Sui | 467 | 5  | 14  |
| Han-Sui | 477 | 8  | 26  |
| Han-Sui | 478 | 1  | 1   |
| Han-Sui | 481 | 2  | 4   |
| Han-Sui | 482 | 11 | 39  |
| Han-Sui | 483 | 2  | 4   |
| Han-Sui | 484 | 7  | 22  |
| Han-Sui | 492 | 1  | 1   |
| Han-Sui | 503 | 2  | 4   |
| Han-Sui | 504 | 6  | 18  |
| Han-Sui | 507 | 3  | 8   |
| Han-Sui | 508 | 1  | 1   |
| Han-Sui | 512 | 1  | 1   |



|         |     |    |     |
|---------|-----|----|-----|
| Han-Sui | 530 | 2  | 4   |
| Han-Sui | 535 | 5  | 14  |
| Han-Sui | 550 | 4  | 11  |
| Han-Sui | 554 | 1  | 1   |
| Han-Sui | 556 | 2  | 4   |
| Han-Sui | 557 | 24 | 144 |
| Han-Sui | 558 | 8  | 26  |
| Han-Sui | 559 | 6  | 18  |
| Han-Sui | 571 | 3  | 8   |
| Han-Sui | 573 | 8  | 26  |
| Han-Sui | 594 | 1  | 1   |
| Han-Sui | 596 | 2  | 4   |
| Tang    | 623 | 1  | 1   |
| Tang    | 628 | 2  | 4   |
| Tang    | 629 | 4  | 10  |
| Tang    | 630 | 3  | 7   |
| Tang    | 646 | 1  | 1   |
| Tang    | 647 | 2  | 4   |
| Tang    | 650 | 4  | 10  |
| Tang    | 653 | 1  | 1   |
| Tang    | 682 | 4  | 10  |
| Tang    | 692 | 1  | 1   |
| Tang    | 693 | 2  | 4   |
| Tang    | 710 | 1  | 1   |
| Tang    | 713 | 2  | 4   |
| Tang    | 714 | 1  | 1   |
| Tang    | 715 | 16 | 53  |
| Tang    | 716 | 18 | 62  |
| Tang    | 717 | 3  | 7   |
| Tang    | 721 | 1  | 1   |
| Tang    | 737 | 1  | 1   |
| Tang    | 764 | 5  | 14  |
| Tang    | 784 | 25 | 99  |
| Tang    | 785 | 30 | 130 |
| Tang    | 786 | 4  | 10  |
| Tang    | 805 | 3  | 7   |
| Tang    | 806 | 3  | 7   |
| Tang    | 807 | 1  | 1   |
| Tang    | 810 | 3  | 7   |
| Tang    | 822 | 1  | 1   |
| Tang    | 823 | 3  | 7   |
| Tang    | 824 | 2  | 4   |
| Tang    | 825 | 2  | 4   |
| Tang    | 827 | 1  | 1   |
| Tang    | 830 | 2  | 4   |
| Tang    | 832 | 2  | 4   |
| Tang    | 836 | 3  | 7   |
| Tang    | 837 | 12 | 37  |
| Tang    | 838 | 6  | 17  |

|      |     |    |     |
|------|-----|----|-----|
| Tang | 839 | 14 | 45  |
| Tang | 840 | 26 | 105 |
| Tang | 841 | 4  | 10  |
| Tang | 851 | 2  | 4   |
| Tang | 854 | 2  | 4   |
| Tang | 862 | 3  | 7   |
| Tang | 865 | 5  | 14  |
| Tang | 866 | 6  | 17  |
| Tang | 868 | 4  | 10  |
| Tang | 869 | 2  | 4   |
| Tang | 875 | 5  | 14  |
| Tang | 878 | 5  | 14  |
| Tang | 885 | 2  | 4   |
| Tang | 886 | 3  | 7   |
| Tang | 907 | 5  | 14  |
| Tang | 920 | 1  | 1   |
| Tang | 925 | 6  | 17  |
| Tang | 928 | 2  | 4   |
| Tang | 932 | 1  | 1   |
| Tang | 939 | 6  | 17  |
| Tang | 940 | 1  | 1   |
| Tang | 941 | 1  | 1   |
| Tang | 942 | 27 | 111 |
| Tang | 943 | 28 | 117 |
| Tang | 944 | 25 | 99  |
| Tang | 945 | 18 | 62  |
| Tang | 947 | 1  | 1   |
| Tang | 948 | 12 | 37  |
| Tang | 949 | 21 | 77  |
| Song | 972 | 1  | 1   |
| Song | 985 | 1  | 1   |
| Song | 953 | 2  | 4   |
| Song | 960 | 2  | 4   |
| Song | 961 | 2  | 4   |
| Song | 962 | 6  | 16  |
| Song | 963 | 5  | 13  |
| Song | 964 | 7  | 19  |
| Song | 965 | 5  | 13  |
| Song | 969 | 2  | 4   |
| Song | 974 | 2  | 4   |
| Song | 977 | 3  | 7   |
| Song | 981 | 2  | 4   |
| Song | 982 | 6  | 16  |
| Song | 983 | 3  | 7   |
| Song | 986 | 3  | 7   |
| Song | 989 | 1  | 1   |
| Song | 990 | 8  | 22  |
| Song | 991 | 6  | 16  |
| Song | 992 | 12 | 35  |

|      |      |    |     |
|------|------|----|-----|
| Song | 996  | 7  | 19  |
| Song | 997  | 1  | 1   |
| Song | 1001 | 1  | 1   |
| Song | 1004 | 3  | 7   |
| Song | 1005 | 3  | 7   |
| Song | 1006 | 2  | 4   |
| Song | 1006 | 4  | 4   |
| Song | 1007 | 3  | 7   |
| Song | 1009 | 1  | 1   |
| Song | 1010 | 1  | 1   |
| Song | 1011 | 7  | 19  |
| Song | 1016 | 13 | 39  |
| Song | 1017 | 65 | 313 |
| Song | 1018 | 4  | 10  |
| Song | 1020 | 1  | 1   |
| Song | 1022 | 2  | 4   |
| Song | 1024 | 5  | 13  |
| Song | 1027 | 4  | 10  |
| Song | 1028 | 3  | 7   |
| Song | 1033 | 8  | 22  |
| Song | 1034 | 3  | 7   |
| Song | 1037 | 1  | 1   |
| Song | 1039 | 5  | 13  |
| Song | 1041 | 4  | 10  |
| Song | 1044 | 3  | 7   |
| Song | 1047 | 2  | 4   |
| Song | 1048 | 2  | 4   |
| Song | 1052 | 3  | 7   |
| Song | 1053 | 2  | 4   |
| Song | 1056 | 1  | 1   |
| Song | 1066 | 1  | 1   |
| Song | 1067 | 1  | 1   |
| Song | 1068 | 1  | 1   |
| Song | 1070 | 1  | 1   |
| Song | 1072 | 5  | 13  |
| Song | 1073 | 7  | 19  |
| Song | 1074 | 4  | 10  |
| Song | 1075 | 4  | 10  |
| Song | 1076 | 6  | 16  |
| Song | 1077 | 4  | 10  |
| Song | 1079 | 1  | 1   |
| Song | 1081 | 6  | 16  |
| Song | 1082 | 4  | 10  |
| Song | 1083 | 2  | 4   |
| Song | 1088 | 2  | 4   |
| Song | 1098 | 1  | 1   |
| Song | 1100 | 1  | 1   |
| Song | 1101 | 2  | 4   |
| Song | 1102 | 9  | 25  |

|      |      |    |    |
|------|------|----|----|
| Song | 1103 | 5  | 13 |
| Song | 1104 | 8  | 22 |
| Song | 1105 | 7  | 19 |
| Song | 1120 | 1  | 1  |
| Song | 1121 | 5  | 13 |
| Song | 1123 | 2  | 4  |
| Song | 1124 | 1  | 1  |
| Song | 1128 | 4  | 10 |
| Song | 1129 | 3  | 7  |
| Song | 1135 | 1  | 1  |
| Song | 1141 | 1  | 1  |
| Song | 1142 | 2  | 4  |
| Song | 1145 | 3  | 7  |
| Song | 1149 | 1  | 1  |
| Song | 1156 | 1  | 1  |
| Song | 1157 | 5  | 13 |
| Song | 1158 | 1  | 1  |
| Song | 1159 | 5  | 13 |
| Song | 1160 | 4  | 10 |
| Song | 1162 | 12 | 35 |
| Song | 1163 | 15 | 46 |
| Song | 1164 | 3  | 7  |
| Song | 1165 | 3  | 7  |
| Song | 1166 | 1  | 1  |
| Song | 1167 | 5  | 13 |
| Song | 1173 | 1  | 1  |
| Song | 1174 | 3  | 7  |
| Song | 1176 | 19 | 61 |
| Song | 1177 | 2  | 4  |
| Song | 1180 | 1  | 1  |
| Song | 1181 | 2  | 4  |
| Song | 1182 | 15 | 46 |
| Song | 1183 | 7  | 19 |
| Song | 1187 | 3  | 7  |
| Song | 1191 | 6  | 16 |
| Song | 1194 | 2  | 4  |
| Song | 1196 | 1  | 1  |
| Song | 1198 | 1  | 1  |
| Song | 1200 | 1  | 1  |
| Song | 1202 | 10 | 29 |
| Song | 1205 | 1  | 1  |
| Song | 1206 | 6  | 16 |
| Song | 1207 | 6  | 16 |
| Song | 1208 | 9  | 25 |
| Song | 1209 | 7  | 19 |
| Song | 1210 | 2  | 4  |
| Song | 1214 | 3  | 7  |
| Song | 1215 | 12 | 35 |
| Song | 1216 | 13 | 39 |

|      |      |    |     |
|------|------|----|-----|
| Song | 1217 | 3  | 7   |
| Song | 1218 | 4  | 10  |
| Song | 1222 | 3  | 7   |
| Song | 1226 | 1  | 1   |
| Song | 1230 | 1  | 1   |
| Song | 1234 | 1  | 1   |
| Song | 1235 | 1  | 1   |
| Song | 1238 | 5  | 13  |
| Song | 1239 | 4  | 10  |
| Song | 1240 | 6  | 16  |
| Song | 1241 | 5  | 13  |
| Song | 1242 | 3  | 7   |
| Song | 1243 | 1  | 1   |
| Song | 1245 | 2  | 4   |
| Song | 1246 | 3  | 7   |
| Song | 1262 | 5  | 13  |
| Yuan | 1263 | 7  | 22  |
| Yuan | 1264 | 2  | 5   |
| Yuan | 1265 | 10 | 35  |
| Yuan | 1266 | 11 | 41  |
| Yuan | 1267 | 5  | 15  |
| Yuan | 1268 | 4  | 12  |
| Yuan | 1269 | 5  | 15  |
| Yuan | 1270 | 6  | 18  |
| Yuan | 1271 | 18 | 93  |
| Yuan | 1273 | 1  | 3   |
| Yuan | 1278 | 1  | 3   |
| Yuan | 1279 | 20 | 111 |
| Yuan | 1280 | 7  | 22  |
| Yuan | 1281 | 4  | 12  |
| Yuan | 1282 | 6  | 18  |
| Yuan | 1283 | 2  | 5   |
| Yuan | 1284 | 1  | 3   |
| Yuan | 1285 | 9  | 30  |
| Yuan | 1286 | 2  | 5   |
| Yuan | 1288 | 6  | 18  |
| Yuan | 1289 | 9  | 30  |
| Yuan | 1290 | 17 | 84  |
| Yuan | 1292 | 5  | 15  |
| Yuan | 1293 | 7  | 22  |
| Yuan | 1294 | 2  | 5   |
| Yuan | 1295 | 5  | 15  |
| Yuan | 1296 | 25 | 158 |
| Yuan | 1297 | 7  | 22  |
| Yuan | 1298 | 60 | 388 |
| Yuan | 1299 | 10 | 35  |
| Yuan | 1300 | 9  | 30  |
| Yuan | 1301 | 12 | 47  |
| Yuan | 1302 | 9  | 30  |

|      |      |    |     |
|------|------|----|-----|
| Yuan | 1303 | 4  | 12  |
| Yuan | 1304 | 3  | 8   |
| Yuan | 1305 | 13 | 53  |
| Yuan | 1306 | 10 | 35  |
| Yuan | 1307 | 8  | 26  |
| Yuan | 1308 | 10 | 35  |
| Yuan | 1309 | 52 | 328 |
| Yuan | 1310 | 31 | 208 |
| Yuan | 1312 | 1  | 3   |
| Yuan | 1313 | 3  | 8   |
| Yuan | 1315 | 1  | 3   |
| Yuan | 1320 | 4  | 12  |
| Yuan | 1321 | 15 | 68  |
| Yuan | 1322 | 10 | 35  |
| Yuan | 1323 | 2  | 5   |
| Yuan | 1324 | 21 | 120 |
| Yuan | 1325 | 13 | 53  |
| Yuan | 1326 | 21 | 120 |
| Yuan | 1327 | 26 | 167 |
| Yuan | 1328 | 9  | 30  |
| Yuan | 1329 | 20 | 111 |
| Yuan | 1330 | 50 | 315 |
| Yuan | 1331 | 10 | 35  |
| Yuan | 1333 | 2  | 5   |
| Yuan | 1334 | 7  | 22  |
| Yuan | 1336 | 1  | 3   |
| Yuan | 1337 | 4  | 12  |
| Yuan | 1339 | 1  | 3   |
| Yuan | 1340 | 3  | 8   |
| Yuan | 1341 | 3  | 8   |
| Yuan | 1342 | 3  | 8   |
| Yuan | 1343 | 1  | 3   |
| Yuan | 1344 | 3  | 8   |
| Yuan | 1345 | 2  | 5   |
| Yuan | 1348 | 2  | 5   |
| Yuan | 1352 | 14 | 60  |
| Yuan | 1357 | 1  | 3   |
| Yuan | 1358 | 14 | 60  |
| Yuan | 1359 | 60 | 388 |
| Yuan | 1360 | 3  | 8   |
| Yuan | 1361 | 4  | 12  |
| Yuan | 1362 | 5  | 15  |
| Yuan | 1365 | 1  | 3   |

Dataset S2. Reconstructed annual locust time series for period B (AD 1368–1911).  $L_{orig}$ : initial locust index (not corrected for recording effort). Unit: number of counties with locusts multiplied with outbreak intensity, graded 1–3.  $N_{met}$ : number of meteorological-related records in the source archive for that year. Smoothed  $N_{met}$  was used as proxy of recording effort.  $L_{adj}$ : locust index adjusted for recording effort. The annual locust index used in the analysis and for the construction of a decadal index was log-transformed,  $L_{ann} = \ln(L_{adj} + 1)$ .

| Year (AD) | $L_{orig}$ | $N_{met}$ | $L_{adj}$ |
|-----------|------------|-----------|-----------|
| 1368      | 1          | 38        | 5         |
| 1369      | 2          | 48        | 10        |
| 1370      | 1          | 31        | 5         |
| 1371      | 0          | 22        | 0         |
| 1372      | 18         | 39        | 95        |
| 1373      | 10         | 22        | 53        |
| 1374      | 30         | 29        | 160       |
| 1375      | 11         | 40        | 59        |
| 1376      | 0          | 26        | 0         |
| 1377      | 0          | 31        | 0         |
| 1378      | 1          | 29        | 5         |
| 1379      | 0          | 15        | 0         |
| 1380      | 0          | 22        | 0         |
| 1381      | 1          | 12        | 6         |
| 1382      | 3          | 5         | 17        |
| 1383      | 0          | 8         | 0         |
| 1384      | 0          | 23        | 0         |
| 1385      | 0          | 26        | 0         |
| 1386      | 0          | 18        | 0         |
| 1387      | 0          | 26        | 0         |
| 1388      | 0          | 9         | 0         |
| 1389      | 0          | 19        | 0         |
| 1390      | 0          | 37        | 0         |
| 1391      | 1          | 25        | 6         |
| 1392      | 3          | 13        | 17        |
| 1393      | 0          | 15        | 0         |
| 1394      | 0          | 6         | 0         |
| 1395      | 0          | 4         | 0         |
| 1396      | 0          | 9         | 0         |
| 1397      | 2          | 7         | 12        |
| 1398      | 0          | 13        | 0         |
| 1399      | 2          | 13        | 12        |
| 1400      | 2          | 8         | 11        |
| 1401      | 12         | 13        | 69        |
| 1402      | 17         | 14        | 97        |
| 1403      | 17         | 38        | 97        |
| 1404      | 5          | 46        | 28        |

|      |    |     |     |
|------|----|-----|-----|
| 1405 | 3  | 36  | 17  |
| 1406 | 3  | 26  | 17  |
| 1407 | 0  | 28  | 0   |
| 1408 | 1  | 12  | 5   |
| 1409 | 3  | 25  | 16  |
| 1410 | 0  | 23  | 0   |
| 1411 | 1  | 29  | 5   |
| 1412 | 1  | 35  | 5   |
| 1413 | 2  | 26  | 10  |
| 1414 | 2  | 33  | 10  |
| 1415 | 0  | 45  | 0   |
| 1416 | 11 | 72  | 55  |
| 1417 | 3  | 23  | 15  |
| 1418 | 0  | 10  | 0   |
| 1419 | 1  | 6   | 5   |
| 1420 | 0  | 25  | 0   |
| 1421 | 0  | 4   | 0   |
| 1422 | 0  | 24  | 0   |
| 1423 | 4  | 15  | 18  |
| 1424 | 1  | 17  | 4   |
| 1425 | 4  | 37  | 17  |
| 1426 | 4  | 40  | 17  |
| 1427 | 0  | 21  | 0   |
| 1428 | 2  | 60  | 8   |
| 1429 | 2  | 22  | 8   |
| 1430 | 7  | 21  | 28  |
| 1431 | 1  | 36  | 4   |
| 1432 | 2  | 28  | 8   |
| 1433 | 2  | 43  | 7   |
| 1434 | 26 | 65  | 96  |
| 1435 | 13 | 36  | 47  |
| 1436 | 12 | 53  | 42  |
| 1437 | 17 | 67  | 59  |
| 1438 | 0  | 58  | 0   |
| 1439 | 39 | 71  | 130 |
| 1440 | 34 | 103 | 111 |
| 1441 | 63 | 110 | 202 |
| 1442 | 27 | 62  | 85  |
| 1443 | 4  | 41  | 12  |
| 1444 | 0  | 67  | 0   |
| 1445 | 0  | 35  | 0   |
| 1446 | 3  | 28  | 9   |
| 1447 | 27 | 51  | 78  |
| 1448 | 13 | 55  | 37  |
| 1449 | 21 | 59  | 58  |
| 1450 | 1  | 52  | 3   |
| 1451 | 1  | 27  | 3   |
| 1452 | 1  | 55  | 3   |



|      |    |     |    |
|------|----|-----|----|
| 1453 | 0  | 88  | 0  |
| 1454 | 5  | 98  | 13 |
| 1455 | 9  | 74  | 23 |
| 1456 | 19 | 79  | 47 |
| 1457 | 12 | 72  | 29 |
| 1458 | 14 | 55  | 33 |
| 1459 | 0  | 33  | 0  |
| 1460 | 1  | 68  | 2  |
| 1461 | 3  | 50  | 7  |
| 1462 | 13 | 39  | 29 |
| 1463 | 0  | 28  | 0  |
| 1464 | 2  | 37  | 4  |
| 1465 | 0  | 83  | 0  |
| 1466 | 1  | 83  | 2  |
| 1467 | 9  | 53  | 19 |
| 1468 | 2  | 61  | 4  |
| 1469 | 1  | 32  | 2  |
| 1470 | 1  | 117 | 2  |
| 1471 | 2  | 107 | 4  |
| 1472 | 3  | 102 | 6  |
| 1473 | 7  | 101 | 14 |
| 1474 | 0  | 94  | 0  |
| 1475 | 4  | 39  | 8  |
| 1476 | 0  | 61  | 0  |
| 1477 | 1  | 81  | 2  |
| 1478 | 0  | 111 | 0  |
| 1479 | 2  | 40  | 4  |
| 1480 | 4  | 37  | 7  |
| 1481 | 7  | 69  | 13 |
| 1482 | 5  | 135 | 9  |
| 1483 | 7  | 90  | 12 |
| 1484 | 0  | 167 | 0  |
| 1485 | 9  | 146 | 16 |
| 1486 | 5  | 117 | 9  |
| 1487 | 7  | 123 | 12 |
| 1488 | 1  | 111 | 2  |
| 1489 | 0  | 128 | 0  |
| 1490 | 4  | 43  | 7  |
| 1491 | 7  | 74  | 12 |
| 1492 | 3  | 109 | 5  |
| 1493 | 13 | 153 | 21 |
| 1494 | 4  | 96  | 6  |
| 1495 | 4  | 96  | 6  |
| 1496 | 0  | 31  | 0  |
| 1497 | 0  | 39  | 0  |
| 1498 | 0  | 72  | 0  |
| 1499 | 0  | 37  | 0  |
| 1500 | 1  | 43  | 2  |

|      |     |     |     |
|------|-----|-----|-----|
| 1501 | 5   | 99  | 8   |
| 1502 | 2   | 47  | 3   |
| 1503 | 0   | 85  | 0   |
| 1504 | 0   | 80  | 0   |
| 1505 | 10  | 47  | 15  |
| 1506 | 6   | 89  | 9   |
| 1507 | 15  | 110 | 23  |
| 1508 | 12  | 200 | 18  |
| 1509 | 23  | 183 | 34  |
| 1510 | 1   | 120 | 1   |
| 1511 | 3   | 134 | 4   |
| 1512 | 29  | 117 | 43  |
| 1513 | 31  | 142 | 46  |
| 1514 | 4   | 58  | 6   |
| 1515 | 1   | 70  | 1   |
| 1516 | 4   | 116 | 6   |
| 1517 | 4   | 119 | 6   |
| 1518 | 7   | 128 | 10  |
| 1519 | 7   | 153 | 10  |
| 1520 | 11  | 92  | 16  |
| 1521 | 3   | 81  | 4   |
| 1522 | 10  | 175 | 14  |
| 1523 | 7   | 304 | 10  |
| 1524 | 40  | 172 | 57  |
| 1525 | 9   | 100 | 13  |
| 1526 | 24  | 139 | 34  |
| 1527 | 45  | 138 | 63  |
| 1528 | 138 | 312 | 193 |
| 1529 | 316 | 330 | 441 |
| 1530 | 38  | 166 | 53  |
| 1531 | 49  | 131 | 68  |
| 1532 | 97  | 173 | 135 |
| 1533 | 57  | 126 | 79  |
| 1534 | 23  | 158 | 32  |
| 1535 | 85  | 151 | 117 |
| 1536 | 94  | 159 | 129 |
| 1537 | 33  | 122 | 45  |
| 1538 | 24  | 149 | 33  |
| 1539 | 53  | 201 | 72  |
| 1540 | 80  | 171 | 109 |
| 1541 | 71  | 141 | 97  |
| 1542 | 25  | 98  | 34  |
| 1543 | 8   | 123 | 11  |
| 1544 | 14  | 272 | 19  |
| 1545 | 16  | 224 | 22  |
| 1546 | 15  | 116 | 20  |
| 1547 | 4   | 95  | 5   |
| 1548 | 4   | 104 | 5   |

|      |     |     |     |
|------|-----|-----|-----|
| 1549 | 7   | 99  | 9   |
| 1550 | 10  | 147 | 13  |
| 1551 | 16  | 120 | 21  |
| 1552 | 2   | 122 | 3   |
| 1553 | 5   | 221 | 7   |
| 1554 | 8   | 162 | 11  |
| 1555 | 25  | 131 | 33  |
| 1556 | 3   | 128 | 4   |
| 1557 | 14  | 99  | 18  |
| 1558 | 7   | 114 | 9   |
| 1559 | 16  | 123 | 21  |
| 1560 | 115 | 266 | 151 |
| 1561 | 24  | 206 | 31  |
| 1562 | 9   | 131 | 12  |
| 1563 | 1   | 99  | 1   |
| 1564 | 4   | 88  | 5   |
| 1565 | 13  | 101 | 17  |
| 1566 | 5   | 126 | 6   |
| 1567 | 1   | 121 | 1   |
| 1568 | 12  | 192 | 15  |
| 1569 | 26  | 258 | 33  |
| 1570 | 4   | 156 | 5   |
| 1571 | 5   | 116 | 6   |
| 1572 | 10  | 110 | 13  |
| 1573 | 11  | 105 | 14  |
| 1574 | 2   | 118 | 3   |
| 1575 | 0   | 136 | 0   |
| 1576 | 1   | 110 | 1   |
| 1577 | 7   | 104 | 9   |
| 1578 | 2   | 138 | 3   |
| 1579 | 7   | 119 | 9   |
| 1580 | 5   | 135 | 6   |
| 1581 | 12  | 124 | 15  |
| 1582 | 29  | 194 | 36  |
| 1583 | 28  | 151 | 35  |
| 1584 | 3   | 90  | 4   |
| 1585 | 10  | 156 | 12  |
| 1586 | 7   | 279 | 9   |
| 1587 | 15  | 316 | 18  |
| 1588 | 17  | 416 | 21  |
| 1589 | 16  | 288 | 20  |
| 1590 | 11  | 206 | 13  |
| 1591 | 55  | 148 | 67  |
| 1592 | 6   | 122 | 7   |
| 1593 | 3   | 210 | 4   |
| 1594 | 3   | 159 | 4   |
| 1595 | 0   | 117 | 0   |
| 1596 | 39  | 121 | 47  |

|      |     |     |     |
|------|-----|-----|-----|
| 1597 | 3   | 130 | 4   |
| 1598 | 6   | 147 | 7   |
| 1599 | 11  | 143 | 13  |
| 1600 | 9   | 104 | 11  |
| 1601 | 2   | 149 | 2   |
| 1602 | 7   | 107 | 8   |
| 1603 | 4   | 121 | 5   |
| 1604 | 0   | 138 | 0   |
| 1605 | 25  | 118 | 29  |
| 1606 | 64  | 110 | 75  |
| 1607 | 6   | 195 | 7   |
| 1608 | 6   | 199 | 7   |
| 1609 | 24  | 181 | 28  |
| 1610 | 32  | 136 | 37  |
| 1611 | 17  | 136 | 20  |
| 1612 | 13  | 140 | 15  |
| 1613 | 7   | 178 | 8   |
| 1614 | 18  | 148 | 21  |
| 1615 | 62  | 215 | 71  |
| 1616 | 303 | 242 | 346 |
| 1617 | 220 | 182 | 251 |
| 1618 | 37  | 130 | 42  |
| 1619 | 27  | 121 | 31  |
| 1620 | 23  | 158 | 26  |
| 1621 | 17  | 180 | 19  |
| 1622 | 18  | 105 | 20  |
| 1623 | 11  | 79  | 12  |
| 1624 | 24  | 154 | 27  |
| 1625 | 33  | 125 | 37  |
| 1626 | 90  | 162 | 100 |
| 1627 | 37  | 151 | 41  |
| 1628 | 7   | 178 | 8   |
| 1629 | 4   | 126 | 4   |
| 1630 | 11  | 125 | 12  |
| 1631 | 37  | 155 | 41  |
| 1632 | 6   | 193 | 7   |
| 1633 | 8   | 175 | 9   |
| 1634 | 47  | 212 | 51  |
| 1635 | 70  | 172 | 77  |
| 1636 | 64  | 270 | 70  |
| 1637 | 80  | 186 | 87  |
| 1638 | 235 | 272 | 255 |
| 1639 | 280 | 319 | 304 |
| 1640 | 280 | 608 | 303 |
| 1641 | 240 | 516 | 259 |
| 1642 | 39  | 276 | 42  |
| 1643 | 10  | 242 | 11  |
| 1644 | 3   | 236 | 3   |

|      |     |     |     |
|------|-----|-----|-----|
| 1645 | 8   | 162 | 9   |
| 1646 | 56  | 253 | 60  |
| 1647 | 196 | 358 | 210 |
| 1648 | 43  | 233 | 46  |
| 1649 | 23  | 190 | 25  |
| 1650 | 29  | 208 | 31  |
| 1651 | 4   | 243 | 4   |
| 1652 | 2   | 315 | 2   |
| 1653 | 7   | 284 | 7   |
| 1654 | 2   | 274 | 2   |
| 1655 | 16  | 231 | 17  |
| 1656 | 44  | 224 | 47  |
| 1657 | 6   | 174 | 6   |
| 1658 | 2   | 189 | 2   |
| 1659 | 3   | 229 | 3   |
| 1660 | 6   | 128 | 6   |
| 1661 | 13  | 202 | 14  |
| 1662 | 3   | 293 | 3   |
| 1663 | 4   | 209 | 4   |
| 1664 | 10  | 227 | 11  |
| 1665 | 15  | 333 | 16  |
| 1666 | 11  | 142 | 12  |
| 1667 | 119 | 220 | 125 |
| 1668 | 14  | 275 | 15  |
| 1669 | 0   | 180 | 0   |
| 1670 | 5   | 345 | 5   |
| 1671 | 78  | 381 | 82  |
| 1672 | 212 | 337 | 223 |
| 1673 | 7   | 140 | 7   |
| 1674 | 12  | 194 | 13  |
| 1675 | 4   | 114 | 4   |
| 1676 | 4   | 151 | 4   |
| 1677 | 12  | 161 | 13  |
| 1678 | 19  | 237 | 20  |
| 1679 | 91  | 393 | 96  |
| 1680 | 9   | 296 | 10  |
| 1681 | 4   | 174 | 4   |
| 1682 | 5   | 150 | 5   |
| 1683 | 1   | 204 | 1   |
| 1684 | 9   | 181 | 10  |
| 1685 | 4   | 149 | 4   |
| 1686 | 26  | 154 | 28  |
| 1687 | 24  | 124 | 26  |
| 1688 | 8   | 138 | 9   |
| 1689 | 9   | 184 | 10  |
| 1690 | 44  | 267 | 47  |
| 1691 | 217 | 257 | 233 |
| 1692 | 31  | 173 | 33  |

|      |    |     |    |
|------|----|-----|----|
| 1693 | 22 | 221 | 24 |
| 1694 | 39 | 129 | 42 |
| 1695 | 6  | 123 | 6  |
| 1696 | 3  | 223 | 3  |
| 1697 | 11 | 163 | 12 |
| 1698 | 3  | 121 | 3  |
| 1699 | 16 | 122 | 17 |
| 1700 | 5  | 103 | 5  |
| 1701 | 4  | 87  | 4  |
| 1702 | 1  | 109 | 1  |
| 1703 | 2  | 229 | 2  |
| 1704 | 7  | 208 | 8  |
| 1705 | 21 | 147 | 23 |
| 1706 | 3  | 147 | 3  |
| 1707 | 1  | 130 | 1  |
| 1708 | 10 | 211 | 11 |
| 1709 | 19 | 210 | 21 |
| 1710 | 6  | 121 | 7  |
| 1711 | 20 | 103 | 23 |
| 1712 | 5  | 98  | 6  |
| 1713 | 1  | 130 | 1  |
| 1714 | 12 | 172 | 14 |
| 1715 | 6  | 139 | 7  |
| 1716 | 5  | 180 | 6  |
| 1717 | 1  | 74  | 1  |
| 1718 | 6  | 109 | 7  |
| 1719 | 1  | 131 | 1  |
| 1720 | 2  | 194 | 2  |
| 1721 | 6  | 321 | 7  |
| 1722 | 19 | 241 | 22 |
| 1723 | 55 | 292 | 65 |
| 1724 | 36 | 197 | 43 |
| 1725 | 3  | 210 | 4  |
| 1726 | 3  | 239 | 4  |
| 1727 | 6  | 249 | 7  |
| 1728 | 2  | 170 | 2  |
| 1729 | 7  | 185 | 8  |
| 1730 | 2  | 277 | 2  |
| 1731 | 3  | 173 | 4  |
| 1732 | 8  | 177 | 10 |
| 1733 | 3  | 172 | 4  |
| 1734 | 3  | 99  | 4  |
| 1735 | 11 | 123 | 14 |
| 1736 | 2  | 173 | 2  |
| 1737 | 10 | 208 | 12 |
| 1738 | 15 | 174 | 19 |
| 1739 | 13 | 193 | 16 |
| 1740 | 28 | 145 | 35 |

|      |    |     |    |
|------|----|-----|----|
| 1741 | 2  | 154 | 3  |
| 1742 | 1  | 205 | 1  |
| 1743 | 4  | 291 | 5  |
| 1744 | 38 | 242 | 49 |
| 1745 | 7  | 198 | 9  |
| 1746 | 3  | 173 | 4  |
| 1747 | 6  | 202 | 8  |
| 1748 | 28 | 240 | 36 |
| 1749 | 0  | 136 | 0  |
| 1750 | 4  | 172 | 5  |
| 1751 | 9  | 253 | 12 |
| 1752 | 42 | 205 | 55 |
| 1753 | 13 | 177 | 17 |
| 1754 | 0  | 138 | 0  |
| 1755 | 11 | 186 | 15 |
| 1756 | 1  | 200 | 1  |
| 1757 | 4  | 160 | 5  |
| 1758 | 10 | 102 | 13 |
| 1759 | 43 | 214 | 57 |
| 1760 | 4  | 127 | 5  |
| 1761 | 2  | 189 | 3  |
| 1762 | 1  | 126 | 1  |
| 1763 | 19 | 74  | 25 |
| 1764 | 9  | 139 | 12 |
| 1765 | 5  | 135 | 7  |
| 1766 | 1  | 98  | 1  |
| 1767 | 0  | 127 | 0  |
| 1768 | 12 | 157 | 16 |
| 1769 | 3  | 123 | 4  |
| 1770 | 20 | 137 | 27 |
| 1771 | 9  | 141 | 12 |
| 1772 | 3  | 61  | 4  |
| 1773 | 3  | 90  | 4  |
| 1774 | 22 | 129 | 29 |
| 1775 | 17 | 137 | 22 |
| 1776 | 6  | 87  | 8  |
| 1777 | 2  | 69  | 3  |
| 1778 | 11 | 240 | 14 |
| 1779 | 0  | 118 | 0  |
| 1780 | 0  | 104 | 0  |
| 1781 | 0  | 164 | 0  |
| 1782 | 6  | 109 | 8  |
| 1783 | 5  | 100 | 6  |
| 1784 | 6  | 156 | 8  |
| 1785 | 25 | 330 | 32 |
| 1786 | 58 | 311 | 73 |
| 1787 | 21 | 138 | 26 |
| 1788 | 2  | 156 | 3  |

|      |     |     |     |
|------|-----|-----|-----|
| 1789 | 2   | 106 | 2   |
| 1790 | 0   | 158 | 0   |
| 1791 | 4   | 101 | 5   |
| 1792 | 5   | 183 | 6   |
| 1793 | 7   | 134 | 9   |
| 1794 | 0   | 192 | 0   |
| 1795 | 9   | 132 | 11  |
| 1796 | 9   | 200 | 11  |
| 1797 | 5   | 121 | 6   |
| 1798 | 3   | 112 | 4   |
| 1799 | 14  | 103 | 17  |
| 1800 | 3   | 175 | 4   |
| 1801 | 2   | 214 | 2   |
| 1802 | 62  | 232 | 72  |
| 1803 | 40  | 156 | 46  |
| 1804 | 11  | 164 | 13  |
| 1805 | 16  | 176 | 18  |
| 1806 | 3   | 144 | 3   |
| 1807 | 1   | 180 | 1   |
| 1808 | 1   | 160 | 1   |
| 1809 | 2   | 126 | 2   |
| 1810 | 0   | 150 | 0   |
| 1811 | 7   | 202 | 8   |
| 1812 | 3   | 190 | 3   |
| 1813 | 5   | 286 | 6   |
| 1814 | 15  | 285 | 16  |
| 1815 | 2   | 140 | 2   |
| 1816 | 0   | 133 | 0   |
| 1817 | 5   | 131 | 5   |
| 1818 | 9   | 125 | 10  |
| 1819 | 0   | 219 | 0   |
| 1820 | 0   | 239 | 0   |
| 1821 | 11  | 309 | 12  |
| 1822 | 3   | 239 | 3   |
| 1823 | 9   | 324 | 9   |
| 1824 | 36  | 164 | 38  |
| 1825 | 58  | 170 | 61  |
| 1826 | 18  | 212 | 19  |
| 1827 | 6   | 121 | 6   |
| 1828 | 1   | 151 | 1   |
| 1829 | 0   | 96  | 0   |
| 1830 | 2   | 164 | 2   |
| 1831 | 3   | 296 | 3   |
| 1832 | 12  | 342 | 12  |
| 1833 | 11  | 321 | 11  |
| 1834 | 0   | 295 | 0   |
| 1835 | 166 | 384 | 169 |
| 1836 | 125 | 265 | 127 |



|      |     |     |     |
|------|-----|-----|-----|
| 1837 | 52  | 186 | 53  |
| 1838 | 26  | 183 | 26  |
| 1839 | 7   | 218 | 7   |
| 1840 | 5   | 186 | 5   |
| 1841 | 4   | 258 | 4   |
| 1842 | 7   | 172 | 7   |
| 1843 | 14  | 173 | 14  |
| 1844 | 1   | 157 | 1   |
| 1845 | 8   | 150 | 8   |
| 1846 | 2   | 238 | 2   |
| 1847 | 13  | 218 | 13  |
| 1848 | 8   | 280 | 8   |
| 1849 | 3   | 279 | 3   |
| 1850 | 0   | 203 | 0   |
| 1851 | 5   | 210 | 5   |
| 1852 | 8   | 220 | 8   |
| 1853 | 23  | 294 | 23  |
| 1854 | 31  | 229 | 31  |
| 1855 | 42  | 242 | 42  |
| 1856 | 310 | 394 | 311 |
| 1857 | 455 | 404 | 457 |
| 1858 | 170 | 280 | 171 |
| 1859 | 22  | 179 | 22  |
| 1860 | 28  | 239 | 28  |
| 1861 | 14  | 252 | 14  |
| 1862 | 115 | 381 | 116 |
| 1863 | 39  | 247 | 39  |
| 1864 | 14  | 257 | 14  |
| 1865 | 7   | 265 | 7   |
| 1866 | 5   | 210 | 5   |
| 1867 | 8   | 303 | 8   |
| 1868 | 12  | 292 | 12  |
| 1869 | 23  | 272 | 24  |
| 1870 | 2   | 274 | 2   |
| 1871 | 5   | 255 | 5   |
| 1872 | 6   | 212 | 6   |
| 1873 | 11  | 197 | 11  |
| 1874 | 2   | 136 | 2   |
| 1875 | 10  | 207 | 11  |
| 1876 | 40  | 297 | 42  |
| 1877 | 103 | 459 | 109 |
| 1878 | 24  | 343 | 26  |
| 1879 | 11  | 214 | 12  |
| 1880 | 11  | 153 | 12  |
| 1881 | 9   | 141 | 10  |
| 1882 | 8   | 162 | 9   |
| 1883 | 1   | 204 | 1   |
| 1884 | 7   | 128 | 8   |

|      |    |     |    |
|------|----|-----|----|
| 1885 | 5  | 140 | 6  |
| 1886 | 20 | 153 | 22 |
| 1887 | 1  | 173 | 1  |
| 1888 | 6  | 153 | 7  |
| 1889 | 4  | 205 | 5  |
| 1890 | 11 | 177 | 13 |
| 1891 | 28 | 167 | 32 |
| 1892 | 73 | 248 | 84 |
| 1893 | 7  | 142 | 8  |
| 1894 | 6  | 145 | 7  |
| 1895 | 10 | 179 | 12 |
| 1896 | 3  | 105 | 4  |
| 1897 | 4  | 110 | 5  |
| 1898 | 5  | 174 | 6  |
| 1899 | 14 | 160 | 17 |
| 1900 | 38 | 272 | 47 |
| 1901 | 15 | 214 | 19 |
| 1902 | 11 | 174 | 14 |
| 1903 | 5  | 96  | 6  |
| 1904 | 4  | 100 | 5  |
| 1905 | 3  | 81  | 4  |
| 1906 | 13 | 129 | 17 |
| 1907 | 3  | 95  | 4  |
| 1908 | 5  | 113 | 7  |
| 1909 | 8  | 141 | 11 |
| 1910 | 4  | 156 | 5  |
| 1911 | 7  | 172 | 10 |
